# Supplementary material for: Core–shell-structured Mn2SnO4@Void@C as a stable anode material for lithium-ion batteries with long cycle life
Source: Royal Society of Chemistry journal article supplement (doi:10.1039/d2dt03664a), 2023-01-01
Supplement: d2dt03664a1.pdf [file d2dt03664a1.pdf]

## Supplementary Information

### Core-shell structured $\text{Mn}_2\text{SnO}_4@\text{Void}@C$ as stable anode material for lithium-ion batteries with long cycle life

Yuanlin Tong<sup>a</sup>, Xiangyang Xu<sup>a,b,\*</sup>, Yanru Liu<sup>a,c</sup>, Yunfei Yao<sup>a</sup>, Dongsheng Chen<sup>a</sup> and Chenyu Huang<sup>a</sup>

<sup>a</sup> School of Minerals Processing and Bioengineering, Central South University, Changsha 410083, China

<sup>b</sup> Hunan Key Laboratory of Mineral Materials and Applications, Changsha 410083, China

<sup>c</sup> Tsinghua-Berkeley Shenzhen Institute & Institute of Materials Research, Tsinghua Shenzhen International Graduate School, Tsinghua University, Shenzhen 518055, China

#### Figure Captions :

Fig. S1 XRD pattern of  $\text{MnSn}(\text{OH})_6$

Fig. S2 SEM image of  $\text{MnSn}(\text{OH})_6$

Fig. S3 TEM images of  $\text{MnSn}(\text{OH})_6@\text{SiO}_2$

Fig. S4 TEM images of  $\text{Mn}_2\text{SnO}_4@\text{SiO}_2@C$

Fig. S5 TEM images of  $\text{Mn}_2\text{SnO}_4@C$

Fig. S6 High-resolution XPS spectra of C 1s peak for  $\text{Mn}_2\text{SnO}_4@C$  and  $\text{Mn}_2\text{SnO}_4@\text{Void}@C$

Fig. S7 Galvanostatic discharge/charge curves of  $\text{Mn}_2\text{SnO}_4@C$  (a) and  $\text{Mn}_2\text{SnO}_4$  (b) for selected cycles at  $100 \text{ mA g}^{-1}$

Fig. S8 Cyclic voltammetry (CV) curves of  $\text{Mn}_2\text{SnO}_4@C$  (a) and  $\text{Mn}_2\text{SnO}_4$  (b) at a scan rate of  $0.1 \text{ mV s}^{-1}$

Fig. S9 Corresponding relationships between  $\omega^{-1/2}$  and  $Z'$  at a low frequency of  $\text{Mn}_2\text{SnO}_4$ ,  $\text{Mn}_2\text{SnO}_4@C$  and  $\text{Mn}_2\text{SnO}_4@\text{Void}@C$

Fig. S10 SEM images of cross-sectional morphology for  $\text{Mn}_2\text{SnO}_4@\text{Void}@C$  electrode after 0 (a) and 1000 (b) discharge-charge cycles

Fig. S11 SEM images of surface morphology for  $\text{Mn}_2\text{SnO}_4$ ,  $\text{Mn}_2\text{SnO}_4@C$  and  $\text{Mn}_2\text{SnO}_4@\text{Void}@C$  electrode after 0 (a, b and c, respectively) and 1000 (e, d and f, respectively) charge-discharge cycles at  $1.0 \text{ A g}^{-1}$

#### Table Captions :

Table S1. Vibration types of absorption peaks on FTIR spectra

Table S2. Fitted EIS results of raw materials

Table S3. Electrochemical performance comparison of  $\text{Mn}_2\text{SnO}_4@\text{Void}@C$  and other Sn-based materials for lithium-ion half cell

---

\* Corresponding author: School of Minerals Processing and Bioengineering, Central South University, Changsha 410083, China

E-mail address: [xuxiangyang@csu.edu.cn](mailto:xuxiangyang@csu.edu.cn)

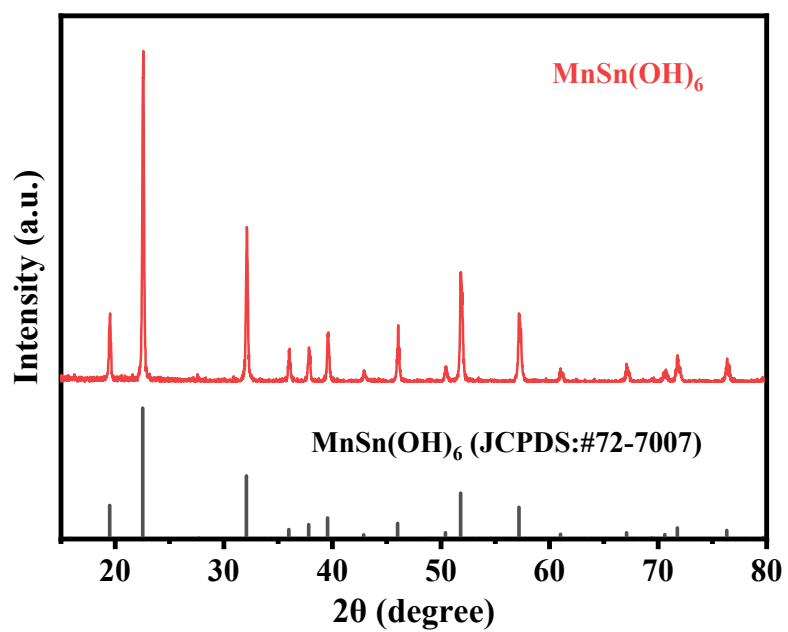

Fig. S1 XRD pattern of  $\text{MnSn(OH)}_6$  precursor

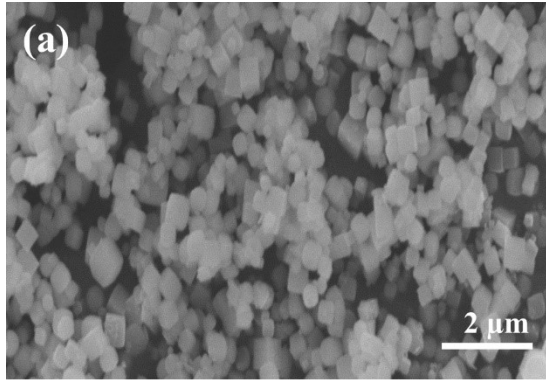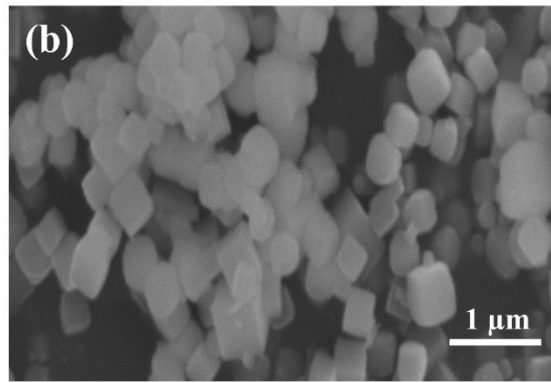

**Fig.S2** SEM images of MnSn(OH)<sub>6</sub>

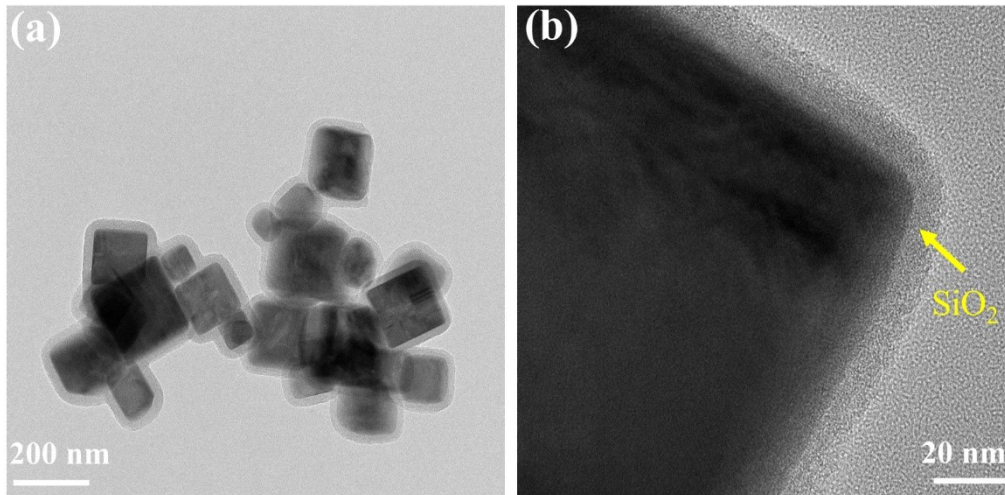

**Fig.S3** TEM images of MnSn(OH)<sub>6</sub>@SiO<sub>2</sub>

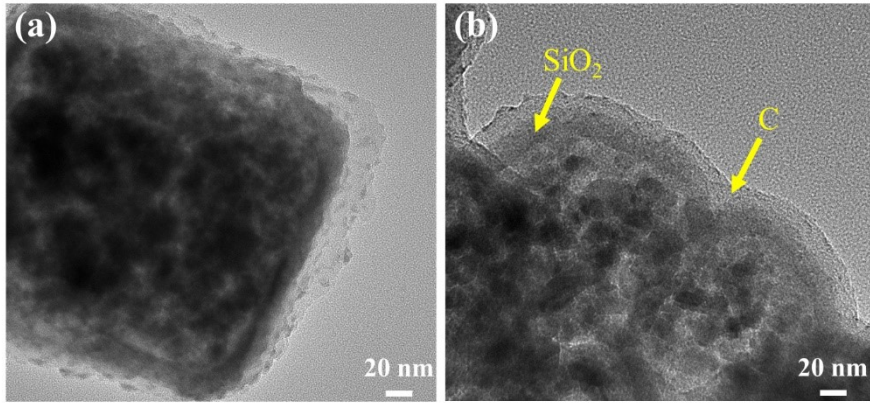

**Fig. S4** TEM images of  $\text{Mn}_2\text{SnO}_4@SiO_2@C$

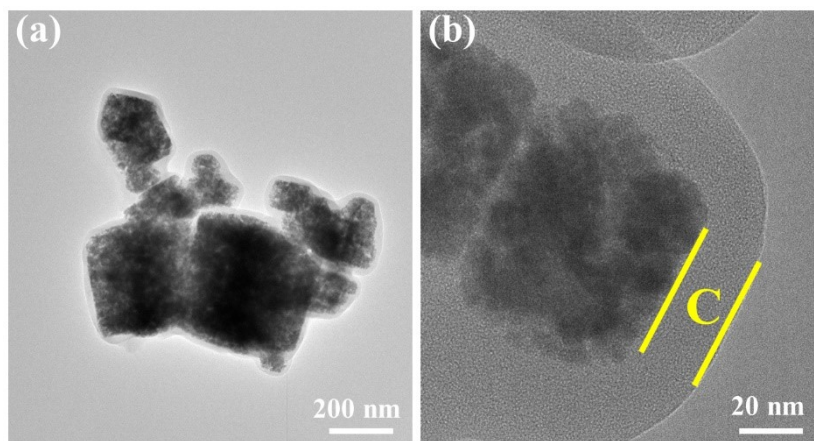

**Fig. S5** TEM images of Mn<sub>2</sub>SnO<sub>4</sub>@C

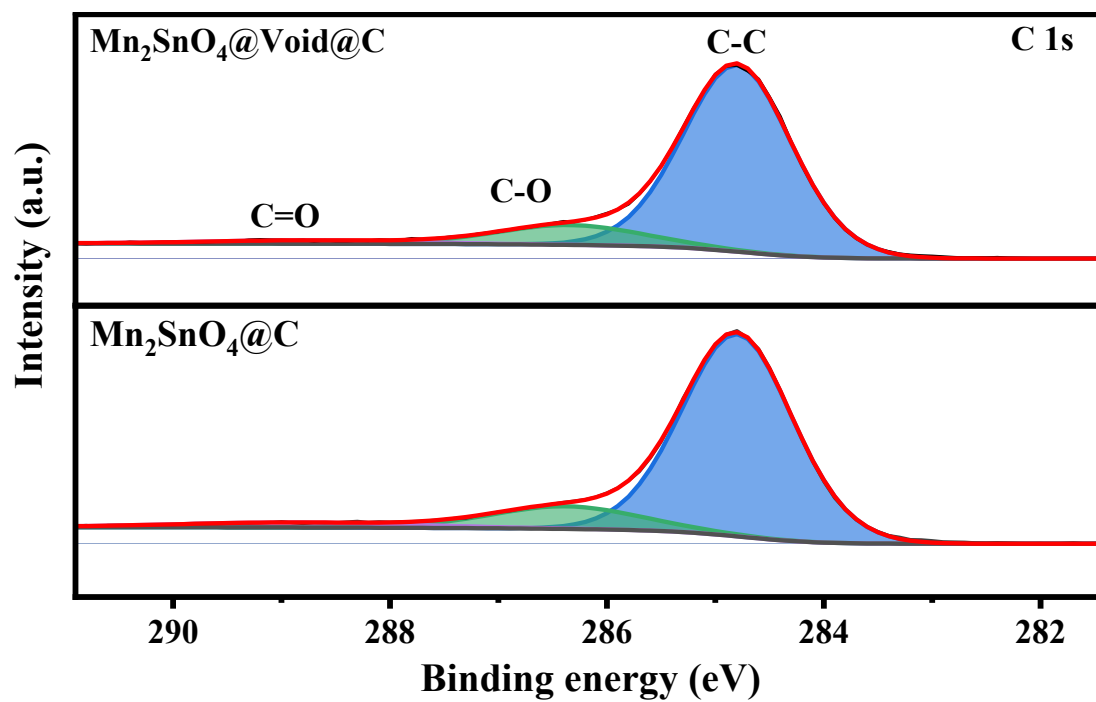

Fig. S6 High-resolution XPS spectra of C 1s peak for  $\text{Mn}_2\text{SnO}_4@C$  and  $\text{Mn}_2\text{SnO}_4@\text{Void}@C$

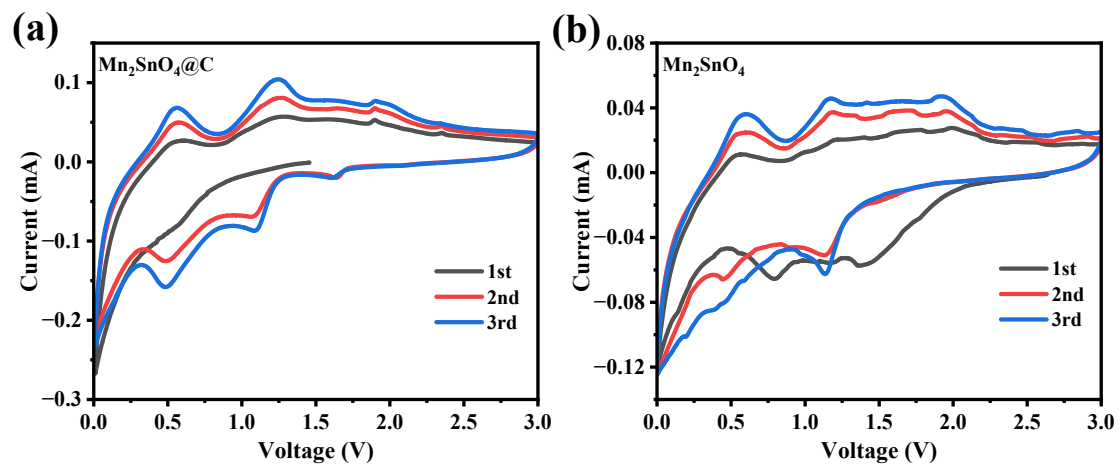

Fig. S7 Cyclic voltammetry (CV) curves of Mn<sub>2</sub>SnO<sub>4</sub>@C (a) and Mn<sub>2</sub>SnO<sub>4</sub> (b) at a scan rate of  $0.1 \text{ mV s}^{-1}$



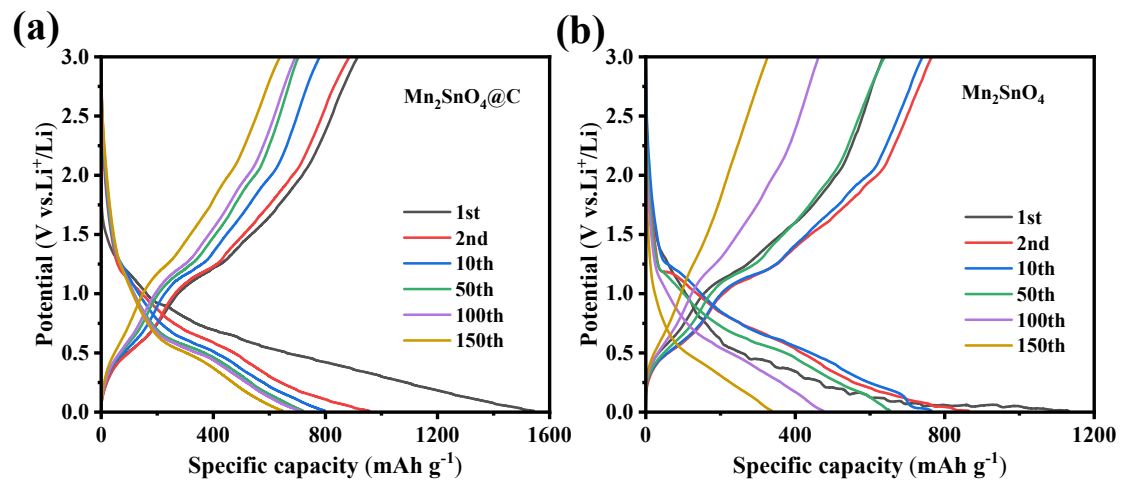

**Fig. S8** Galvanostatic discharge/charge curves of  $\text{Mn}_2\text{SnO}_4@\text{C}$  (a) and  $\text{Mn}_2\text{SnO}_4$  (b) for selected cycles at 100  $\text{mA g}^{-1}$

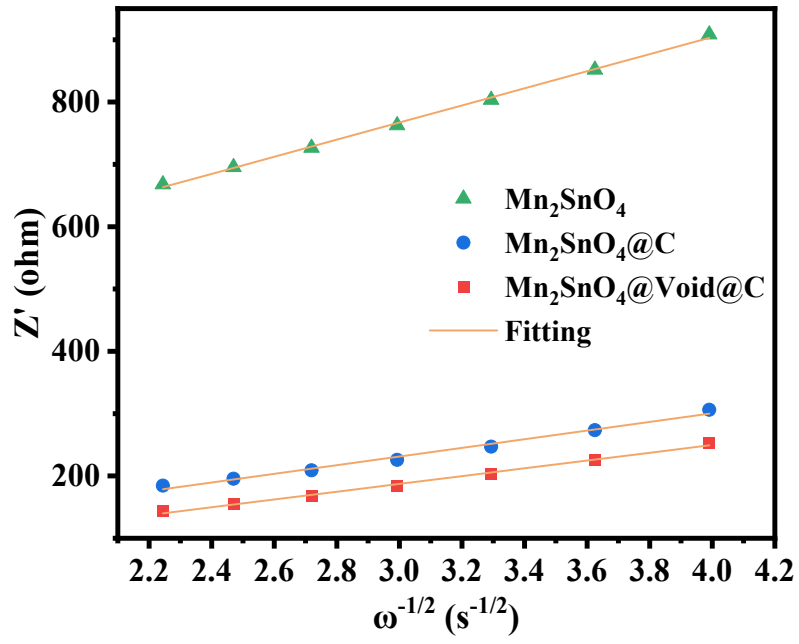

**Fig. S9** Corresponding relationships between  $\omega^{-1/2}$  and  $Z'$  at low frequency of  $Mn_2SnO_4$ ,  $Mn_2SnO_4@C$  and  $Mn_2SnO_4@Void@C$

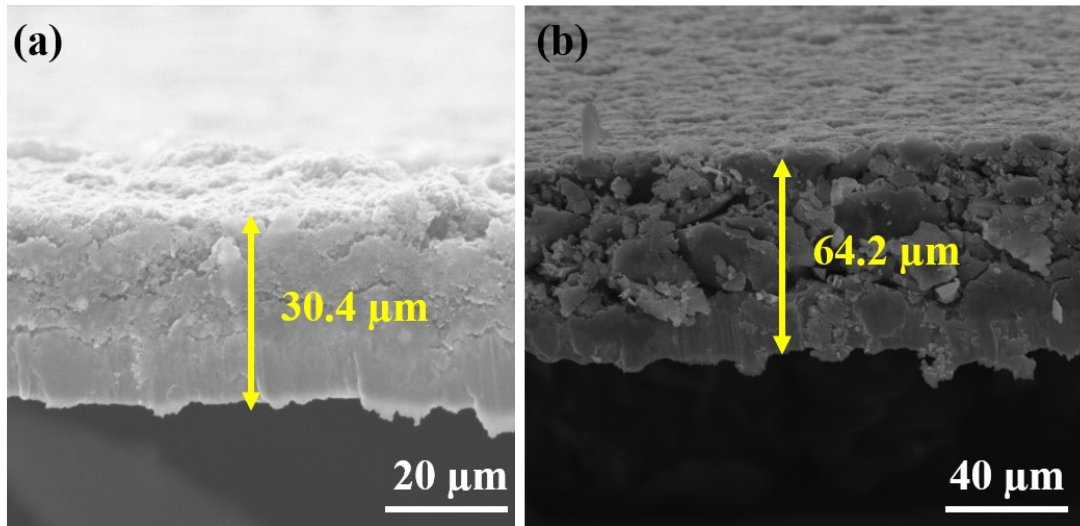

**Fig. S10** SEM images of cross-sectional morphology for  $\text{Mn}_2\text{SnO}_4@ \text{Void}@ \text{C}$  electrode after 0 (a) and 1000 (b) discharge-charge cycles

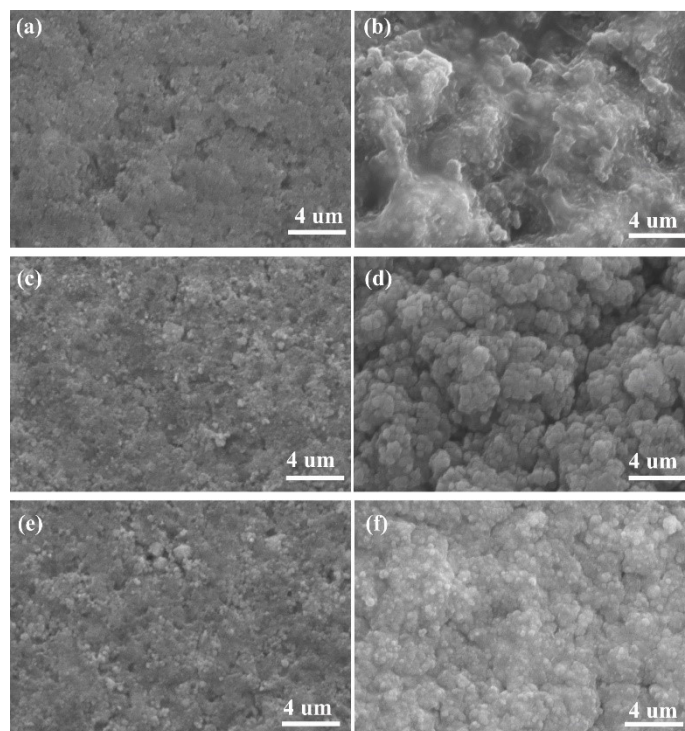

**Fig. S11.** SEM images of surface morphology for Mn<sub>2</sub>SnO<sub>4</sub>, Mn<sub>2</sub>SnO<sub>4</sub>@C and Mn<sub>2</sub>SnO<sub>4</sub>@Void@C electrode after 0 (a, b and c, respectively) and 1000 (e, d and f, respectively) charge-discharge cycles at 1000 mA g<sup>-1</sup>

---

**Table S1** Vibration types of absorption peaks on FTIR spectra

| Wavenumber (cm <sup>-1</sup> ) | Chemical bond | Vibration type       |
|--------------------------------|---------------|----------------------|
| 499                            | Mn-O-Mn       | bending vibration    |
| 541                            | Sn-O-Sn       | bending vibration    |
| 887                            | C-H           | bending vibration    |
| 1257                           | C-O           | stretching vibration |
| 1598                           | C=C           | stretching vibration |
| 3372                           | -OH           | stretching vibration |

---

**Table S2** Fitted EIS results of as-prepared materials

| Sample                                   | Rs ( $\Omega$ ) | Rct ( $\Omega$ ) | CPEct-T ( $\mu\text{F}$ ) | CPEct-P ( $\mu\text{F}$ ) |
|------------------------------------------|-----------------|------------------|---------------------------|---------------------------|
| Mn <sub>2</sub> SnO <sub>4</sub>         | 6.021           | 353.3            | 1.6325E-5                 | 0.79427                   |
| Mn <sub>2</sub> SnO <sub>4</sub> @C      | 3.265           | 90.69            | 1.0669E-5                 | 0.86296                   |
| Mn <sub>2</sub> SnO <sub>4</sub> @Void@C | 4.04            | 51.35            | 1.4388E-5                 | 0.82645                   |

**Table S3** Electrochemical performance comparison of Mn<sub>2</sub>SnO<sub>4</sub>@Void@C and other Sn-based materials for lithium-ion half cell

| Materials                                             | Current density<br>(A g <sup>-1</sup> ) | Cycles | Reversible capacity<br>(mAh g <sup>-1</sup> ) | References |
|-------------------------------------------------------|-----------------------------------------|--------|-----------------------------------------------|------------|
| Sn@Mn <sub>2</sub> SnO <sub>4</sub> -NC               | 0.1                                     | 100    | 1039.5                                        | 1          |
| Mn <sub>2</sub> SnO <sub>4</sub> @Carbon Nanotube     | 0.1                                     | 100    | 611                                           | 2          |
| Mn <sub>2</sub> SnO <sub>4</sub> /Sn/C Cubes          | 0.5                                     | 100    | 908                                           | 3          |
| Mn <sub>2</sub> SnO <sub>4</sub> @RGO                 | 0.1                                     | 100    | 542                                           | 4          |
| Flake-like Mn <sub>2</sub> SnO <sub>4</sub> /C        | 2.0                                     | 100    | 428                                           | 5          |
| SnO <sub>2</sub> /Mn <sub>2</sub> SnO <sub>4</sub> @C | 0.2                                     | 100    | 1293                                          | 6          |
| Bouquet-Like Mn <sub>2</sub> SnO <sub>4</sub> @GS     | 0.4                                     | 200    | 1070                                          | 7          |
| Mn <sub>2</sub> SnO <sub>4</sub> @Void@C              | 0.1                                     | 150    | 783.1                                         | This work  |
|                                                       | 1.0                                     | 1000   | 553.3                                         |            |
|                                                       | 2.0                                     | 400    | 419.6                                         |            |

**Supplementary Information References:**

1. S. Wan, Q. Liu, M. Cheng, Y. Chen and H. Chen, *ACS Appl. Mater. Interfaces*, 2021, **13**, 38278-38288.
2. G. N. Suresh babu and N. Kalaiselvi, *J. Alloys Compd.*, 2021, **889**, 161679.
3. K. Liang, T. Y. Cheang, T. Wen, X. Xie, X. Zhou, Z. W. Zhao, C. C. Shen, N. Jiang and A. W. Xu, *The J. Phys. Chem. C*, 2016, **120**, 3669-3676.
4. L. Cui, X. Li, C. Yin, J. Wang, S. Li, Q. Zhang and S. Kang, *Dalton Trans.*, 2019, **48**, 504-511.
5. X. Shi, X. Lin, S. Liu, A. Li, X. Chen, J. Zhou, Z. Ma and H. Song, *Chem. Eng. J.*, 2019, **372**, 269-276.
6. J. Tian, L. Yang, L. Zha, R. Wang, S. Huang, G. Xu, T. Wei, H. Li, J. Cao and X. Wei, *J. Power Sources*, 2021, **506**, 230243.
7. W. U. Rehman, Y. Xu, X. Sun, I. Ullah, Y. Zhang and L. Li, *ACS Appl. Mater. Interfaces*, 2018, **10**, 17963-17972.
